# Supplementary material
Source: Royal Society of Chemistry journal article supplement (doi:10.1039/d6ay00116e)
Supplement: d6ay00116e1.pdf [file d6ay00116e1.pdf]

## Supporting Information

**Table S1.** RGB values of captured images for standard calibration curve (above) and real samples (below).

| F <sup>-</sup> (mg/L) | 0.0   | 0.1   | 0.2   | 0.3   | 0.4   | 0.5   | 0.6   | 0.7   | 0.8   | 0.9   | 1.0   |
|-----------------------|-------|-------|-------|-------|-------|-------|-------|-------|-------|-------|-------|
| R                     | 169.0 | 169.3 | 172.7 | 174.7 | 167.7 | 174.7 | 173.0 | 173.3 | 170.7 | 176.3 | 174.7 |
| G                     | 169.0 | 159.0 | 156.0 | 152.7 | 141.0 | 144.7 | 138.3 | 135.7 | 126.7 | 128.0 | 122.3 |
| R/G                   | 1.00  | 1.06  | 1.11  | 1.14  | 1.19  | 1.21  | 1.25  | 1.28  | 1.35  | 1.38  | 1.43  |

| Real samples | groundwater | snow  | rain  | lake  | tap water | fine drinking water | purified water | mineral water | toothpaste solution |
|--------------|-------------|-------|-------|-------|-----------|---------------------|----------------|---------------|---------------------|
| R            | 173.0       | 175.7 | 171.7 | 181.0 | 174.7     | 177.7               | 172.0          | 175.0         | 173.0               |
| G            | 128.3       | 141.7 | 154.7 | 138.3 | 138.0     | 144.0               | 163.0          | 133.3         | 153.7               |
| R/G          | 1.35        | 1.24  | 1.11  | 1.31  | 1.27      | 1.23                | 1.06           | 1.31          | 1.13                |

**Table S2.** Comparison of F<sup>-</sup> detection by smartphone-based colorimetry with other coumarin containing receptors.

| Coumarin containing receptors                                                                                                               | Detection method             | Detection limit         | Ref.      |
|---------------------------------------------------------------------------------------------------------------------------------------------|------------------------------|-------------------------|-----------|
| 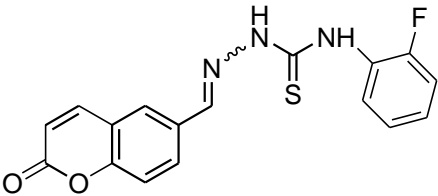<br><chem>Cc1ccc2c(c1)c(=O)oc2C=N\N=C\Nc3cc(F)ccc3</chem>  | Colorimetric & Fluorescence  | 9.42 μM                 | 10        |
| <br><chem>Cc1ccc2c(c1)c(=O)oc2C=N\N=C\Nc3ccc(Cl)cc3</chem> | Colorimetric & Fluorescence  | 22.5 μM                 | 10        |
| <br><chem>Cc1ccc2c(c1)c(=O)oc2C=N\N=C\NC</chem>           | Smartphone-based colorimetry | 1.52 μM<br>(0.088 mg/L) | This work |

**Table S3.** Spiked and recovery test of F<sup>-</sup> in drinking water from smartphone colorimetry. Values were means ± standard deviation (n = 3).

| Water sample | Added (mg/L) | Found (mg/L) | Recovery (%) | RSD (%) |
|--------------|--------------|--------------|--------------|---------|
|              | 0            | 0.61         | -            | -       |
| tap water    | 0.2          | 0.82         | 105.0        | 5.0     |
|              | 0.4          | 0.99         | 95.0         | 4.5     |
|              | 0.6          | 1.23         | 103.3        | 4.8     |

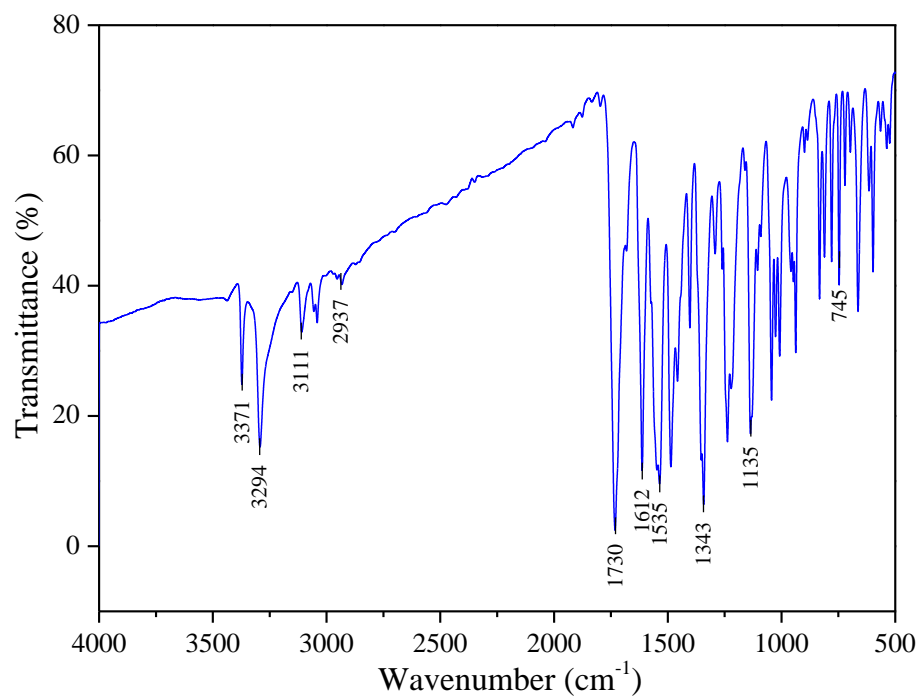

**Fig. S1.** FTIR of receptor R.

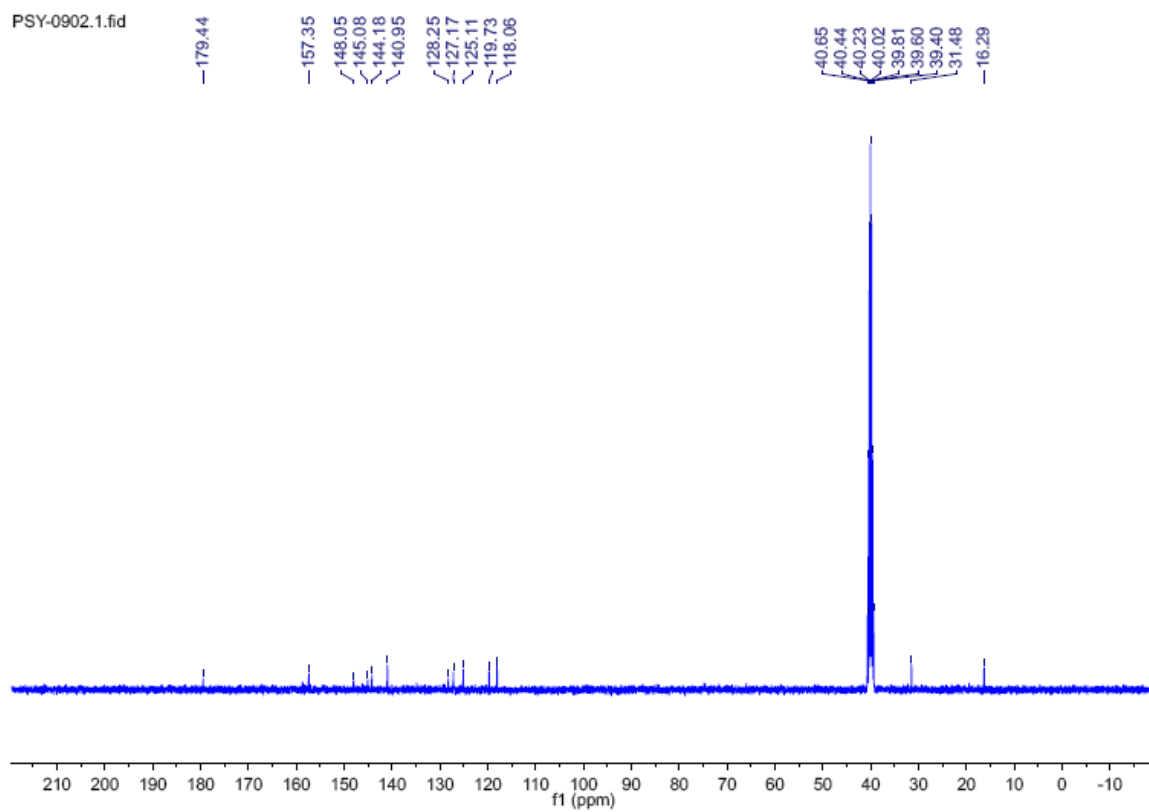

**Fig. S2.**  $^{13}\text{C}$  NMR spectra of receptor R.

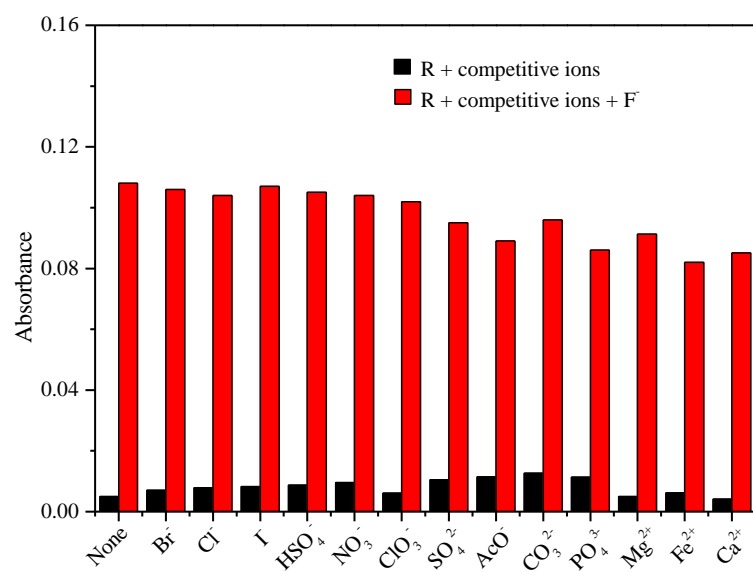

**Fig. S3.** Change in absorbance of receptor R (100 μM) towards F<sup>-</sup> in presence of other ions (10 μM) at 546 nm.

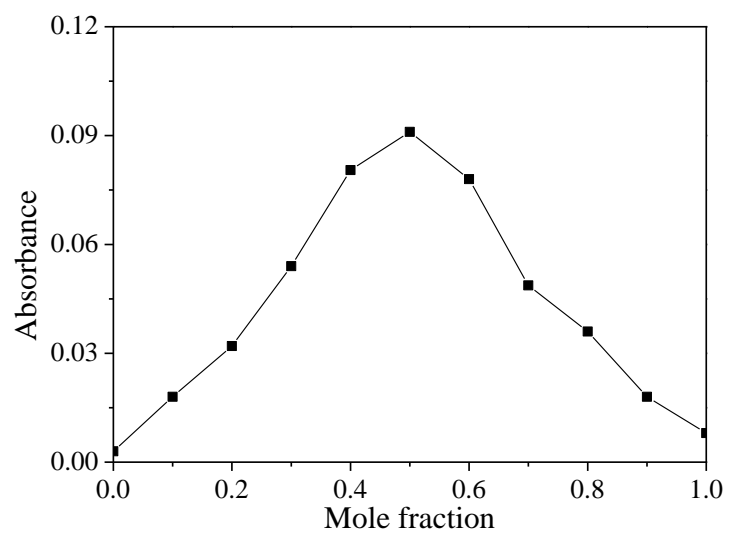

**Fig. S4.** Job's plot for the interaction between receptor R and F<sup>-</sup>.

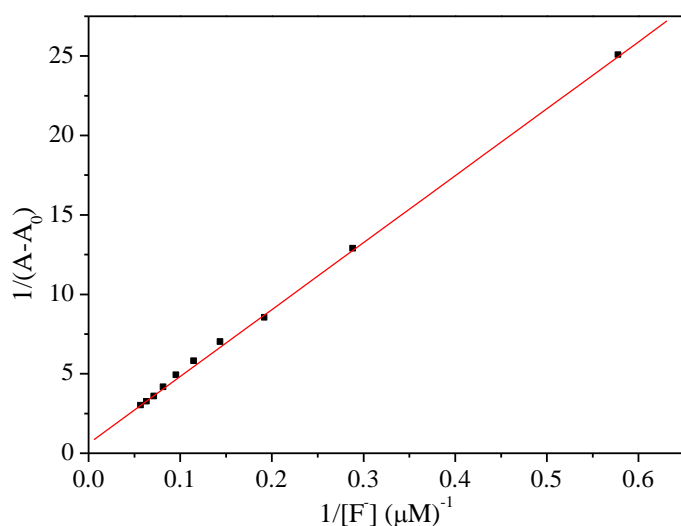

**Fig. S5.** Benesi-Hildebrand plot for receptor R with  $F^-$ . The binding constant of receptor with fluoride was evaluated by Benesi Hildebrand equation (Solanki et al., *Sensor Actuat A: Phys.* 2021, 328: 112776; Jain et al., *Anal Chem Lett.* 2017, 7(2): 170-87):  $1/(A-A_0) = 1/\Delta A_{\max} + 1/(K[F^-]\Delta A_{\max})$ .  $\Delta A_{\max} = A_{\max} - A_0$ , where  $A_0$ ,  $A$ , and  $A_{\max}$  were the receptor absorption with no fluoride, concentration at middle level, and at a maximum binding concentration for complete binding.  $K$  was the binding constant and  $[F^-]$  was the fluoride concentration. The value of  $K$  was determined from the intercept/slope of a linear plot obtained by plotting  $1/(A-A_0)$  vs.  $1/[F^-]$ .

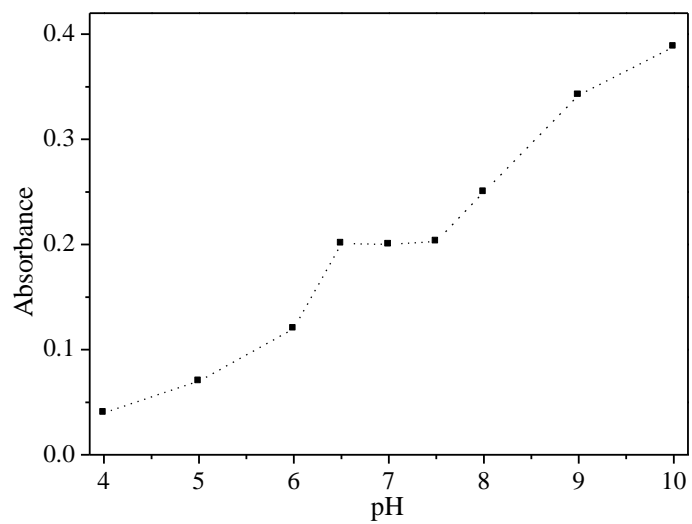

**Fig. S6.** Absorbance changes of receptor R at 546 nm with respect to various pH of solution containing  $F^-$ .
